# Supplementary material for: Highly efficient platelet generation in lung vasculature reproduced by microfluidics
Source: PubMed Central journal article supplement (PMC10329040; doi:10.1038/s41467-023-39598-9), 2023-07-07
Supplement: 41467_2023_39598_MOESM1_ESM.pdf [file 41467_2023_39598_MOESM1_ESM.pdf]

## **Supplementary information**

# **Highly efficient platelet generation in lung vasculature reproduced by microfluidics**

## **Supplementary Method**

### **Materials**

Cell culture reagents including IMDM-Glutamax and penicillin-streptomycin were from Invitrogen (Paisley, UK). Recombinant murine stem cell factor (rSCF) and recombinant murine thrombopoietin (rTPO) were purchased from PeproTech EC (London, UK). PE or FITC-conjugated anti-CD41 antibodies and isotype-nonspecific IgG were from BD Biosciences (Berkshire, UK). FITC-conjugated anti-mouse CD31, CD102 antibodies and isotype-nonspecific IgG were from Biolegend (San Diego, USA). SYLGARD™ 184 Silicone Elastomer Kit was from Dow Corning (Michigan, USA). Anti-mouse GPIIb $\alpha$  antibody R300, FITC-conjugated anti-mouse CD61, CD42b, CD42d, CD49b, Glycoprotein VI (GPVI) antibodies and isotype-nonspecific IgG, PE-conjugated anti-CD62P antibodies, JON/A anti-integrin  $\alpha$ IIb $\beta$ 3 and isotype-nonspecific IgG were from Emfret Analytics (Würzburg, Germany). Hoechst 33342, DRAQ5, Calcein AM, Calcein Deep Red, Tetramethyl rhodamine methyl ester (TMRM) and CellTracker™ Red CMTPX dye were from Molecular Probes™ (Loughborough, UK). DiOC<sub>6</sub> was supplied by Enzo Life Sciences (Exeter, UK). Ibidi slides were from Thistle Scientific (Glasgow, UK). Horm fibrillary collagen was from Takeda Pharma (Linz, Austria). Cross-linked collagen-related peptide (CRP-XL) was provided by Richard Farndale (University of Cambridge, UK). Unless stated, all other reagents were from Sigma-Aldrich (Dorset, UK). Reagents for intravital bone marrow two-photon experiments were as follows: anti-CD105 Alexa Fluor 546 (clone MJ7/19) was purified and

labeled in house; rat monoclonal anti-mouse GPIX (CD42a) Alexa Fluor 488 was from Emfret Analytics and labeling was in house; bovine serum albumin (BSA) was from AppliChem and labeled in house.

# Supplementary Figure

## Supplementary Fig.1

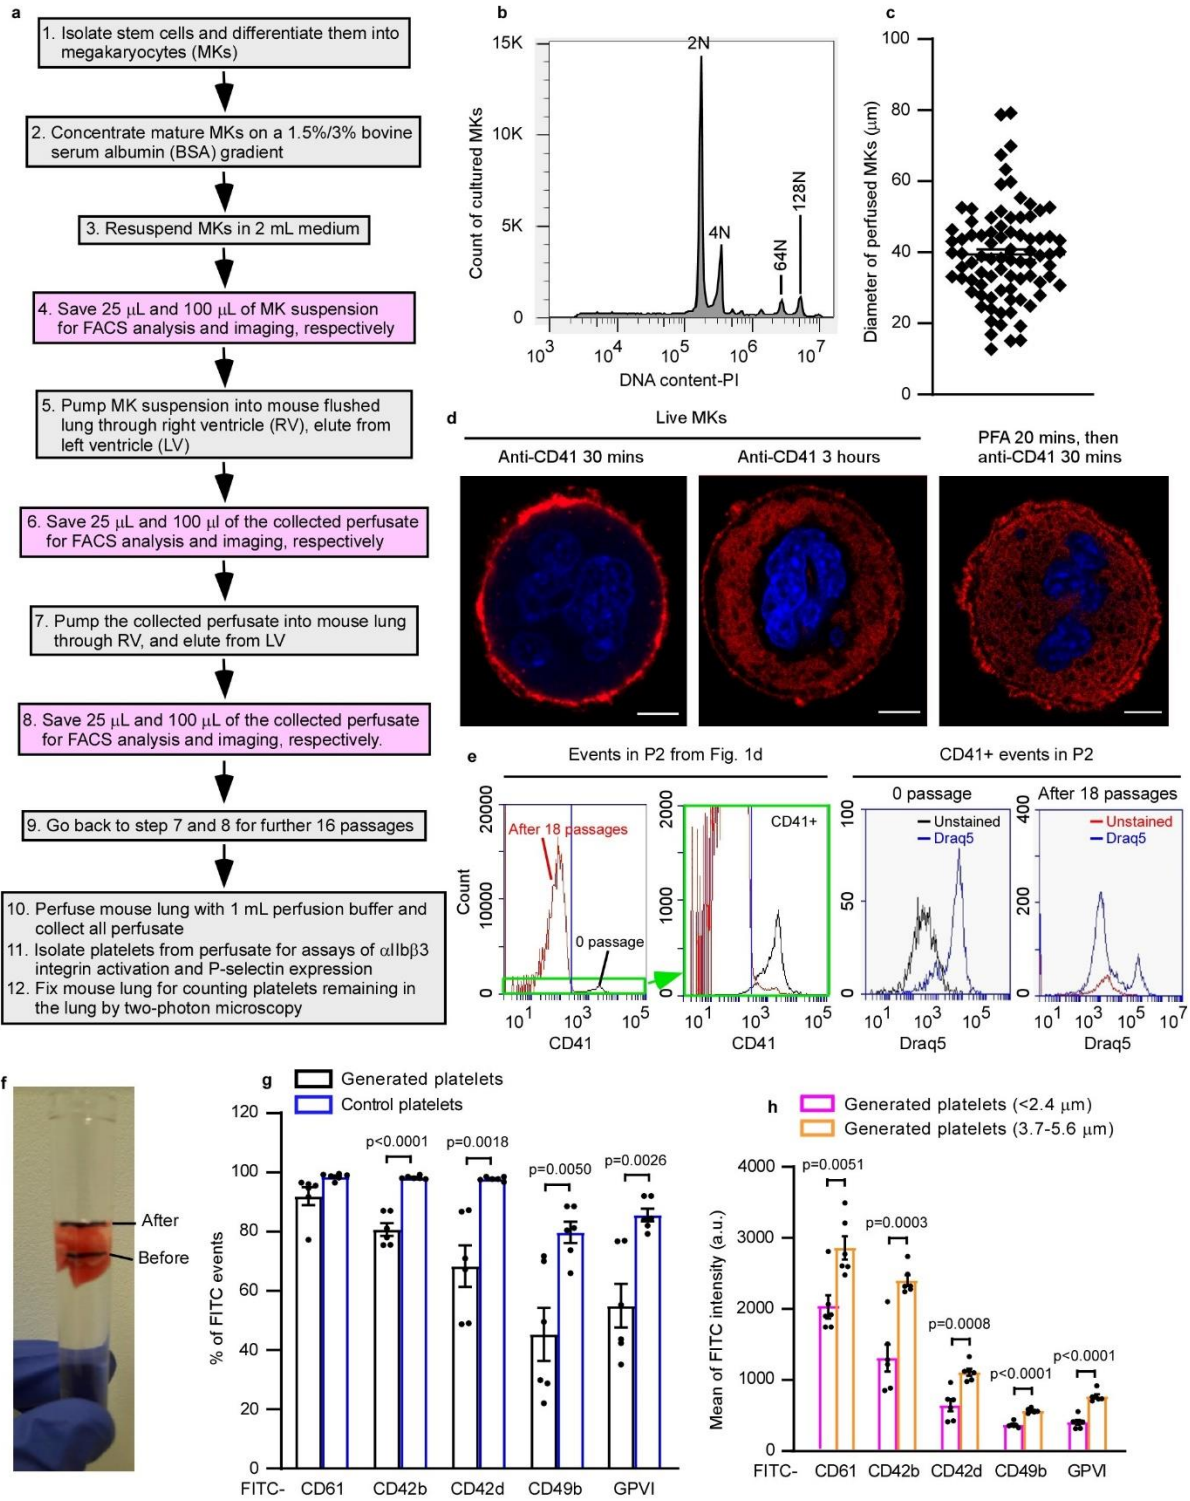

**Supplementary Fig. 1: Approach to generating mouse platelets from megakaryocytes by infusion through the pulmonary vasculature.** **a** Experimental flowchart for generating platelets from repeated infusion of mouse heart-lung preparation. **b** DNA ploidy analysis of cultured mouse megakaryocytes (MKs). MKs were stained with FxCycle PI/RNase staining solution and measured by fluorescence-activated cell sorting (FACS). **c** The diameter of perfused MKs was measured using Fiji. MKs were enriched on a 1.5%/3% bovine serum albumin (BSA) gradient and stained with anti-CD41-PE and Hoechst 33342. Images were obtained on an inverted SP8 confocal microscope. Data are presented as mean  $\pm$  SEM ( $39.4 \pm 1.5 \mu\text{m}$ ). The diameter of MKs (83 MKs from  $n=5$  independent experiments) was measured using Fiji (ImageJ-Win64). **d** The demarcation membrane system (DMS) and plasma membrane of mouse MKs were stained with PE- or FITC-conjugated CD41 (red) and nuclei with Hoechst 33342 (blue). At least 50 MKs from at least 3 independent experiments ( $n>3$ ) for each group were imaged. Images were obtained on an inverted SP8 confocal microscope. Incubation of live MKs with anti-CD41 stains surface receptor by 30 mins, whilst by 3 hours the DMS is also efficiently stained. DMS staining in PFA-fixed MKs is shown for comparison. Scale bar:  $10 \mu\text{m}$ . **e** Example FACS histograms showed the events and CD41+ events in P2 gates from Fig. 1d at 0 passages and after 18 passages.  $10 \mu\text{L}$  of MK suspension at 0 passages or perfusates after 18 passages were measured by FACS. In order to show more clearly CD41+ events in P2, the panel with green surround is a magnified histogram of events in the left-hand panel, as indicated by the green arrow. DRAQ5 staining for MKs provides a positive control for Fig. 1e and Fig. 3d. **f** The lung volume after 18 passages was estimated by a fluid displacement technique. This was used to allow accurate estimation of numbers of platelets generated that were still retained within the circulation of the lung. **g-h** Platelet surface glycoproteins were measured by FACS after staining with different FITC-conjugated antibodies

as indicated. Mouse MKs, labelled with CD41-PE antibody, were passaged through the pulmonary vasculature *ex vivo* 18 times. Lungs were ventilated with air throughout. Generated platelets were defined by staining with CD41-PE antibody. N=6 independent experiments and data are mean  $\pm$  SEM. Two-tailed unpaired *t*-test. **g** % of FITC- positive events was compared between generated platelets and control platelets;  $p < 0.0001$  for CD42b,  $p = 0.0018$  for CD42d,  $p = 0.0050$  for CD49b and  $p = 0.0026$  for GPVI. **h** Surface glycoproteins of two subpopulations of generated platelets, segregated by platelet size (diameter  $< 2.4 \mu\text{m}$  vs diameter  $3.7\text{-}5.6 \mu\text{m}$ ), are shown;  $p = 0.0051$  for CD61,  $p = 0.0003$  for CD42b,  $p = 0.0008$  for CD42d,  $p < 0.0001$  for CD49b and  $p < 0.0001$  for GPVI.
